# Supplementary material for: Are higher follicle-stimulating hormone levels before androgen deprivation therapy for prostate cancer associated with oncological and cardiac outcomes and overall survival?—a population-level analysis
Source: PubMed Central journal article supplement — Transl Androl Urol. 2023 Oct 16;12(10):1540–9. doi: 10.21037/tau-23-114 (PMC10643384; doi:10.21037/tau-23-114), 2023-10-16
Supplement: tau-12-10-1540-dss.pdf [file tau-12-10-1540-dss.pdf]

## Data Sharing Statement

|                     |                                                                                                                                                     |                                                                                                                                                                                                                                            |
|---------------------|-----------------------------------------------------------------------------------------------------------------------------------------------------|--------------------------------------------------------------------------------------------------------------------------------------------------------------------------------------------------------------------------------------------|
| <b>Article Info</b> | <a href="https://dx.doi.org/10.21037/tau-23-114">https://dx.doi.org/10.21037/tau-23-114</a>                                                         |                                                                                                                                                                                                                                            |
| <b>Item</b>         | <b>Question</b>                                                                                                                                     | <b>Authors' Response<br/>(place "-" if not applicable)</b>                                                                                                                                                                                 |
| 1                   | Would you like to share data collected for your study to others?                                                                                    | No.                                                                                                                                                                                                                                        |
| 2                   | If not, would you like to share the reason for your decision?                                                                                       | The data are from the VA and covered by our IRB. We do not have IRB approval to share the data with others. Even sharing of anonymized data would require IRB approval, given these are VA data and we do not have that approval to share. |
| 3                   | What data in particular will be shared?                                                                                                             | -                                                                                                                                                                                                                                          |
| 4                   | Any other documents will be shared? Such as study protocol, statistical analysis plan, informed consent form, clinical study report, analytic code. | -                                                                                                                                                                                                                                          |
| 5                   | When will data availability begin?                                                                                                                  | -                                                                                                                                                                                                                                          |
| 6                   | When will data availability end?                                                                                                                    | -                                                                                                                                                                                                                                          |
| 7                   | To whom will you share the data?                                                                                                                    | -                                                                                                                                                                                                                                          |
| 8                   | For what type of analysis or purpose?                                                                                                               | -                                                                                                                                                                                                                                          |
| 9                   | How or where can the data/documents be obtained?                                                                                                    | -                                                                                                                                                                                                                                          |
| 10                  | Any other restrictions?                                                                                                                             | -                                                                                                                                                                                                                                          |
